# Supplementary material for: Randomised controlled feasibility study of a school-based multi-level intervention to increase physical activity and decrease sedentary behaviour among vocational school students
Source: PubMed Central journal article supplement (PMC5361824; doi:10.1186/s12966-017-0484-0), 2017-03-21

Additional Figure 1. Overview of the intervention tested in the feasibility study.

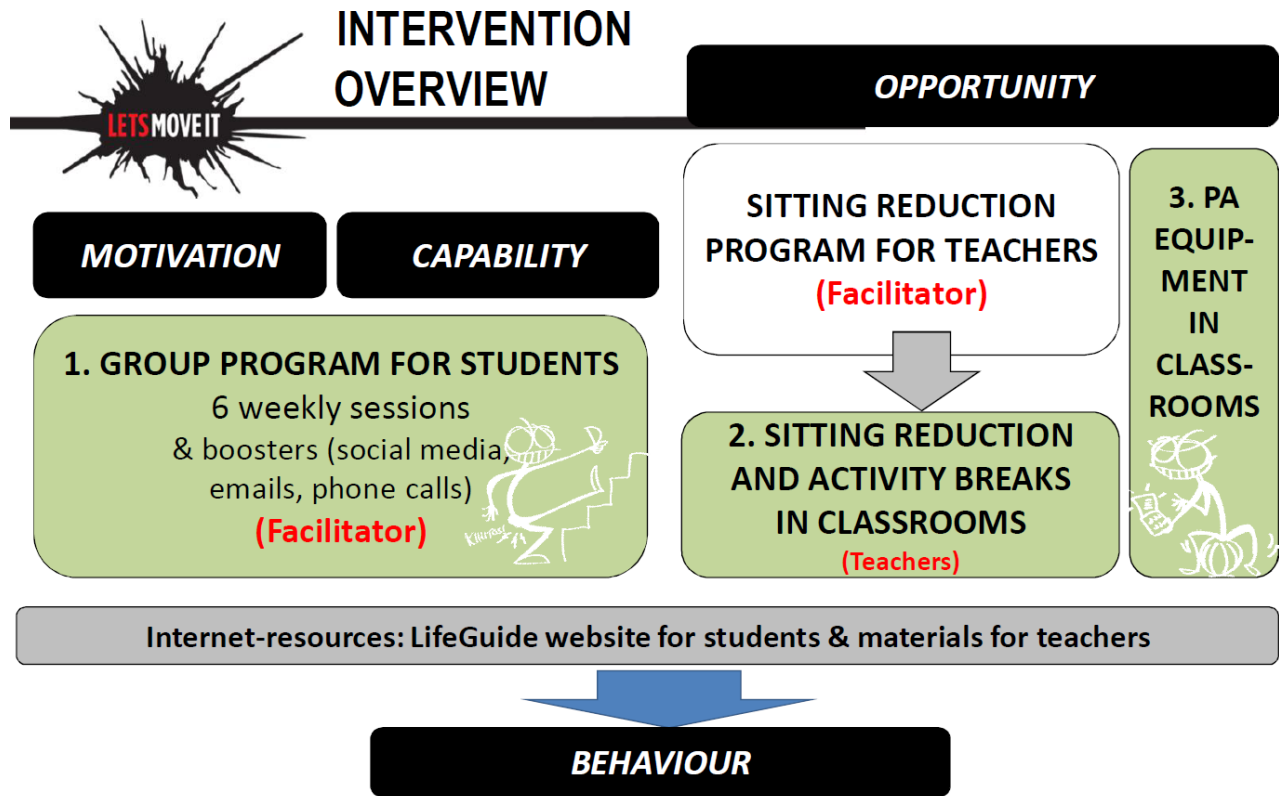

Additional Figure 2. Teacher flow diagram.

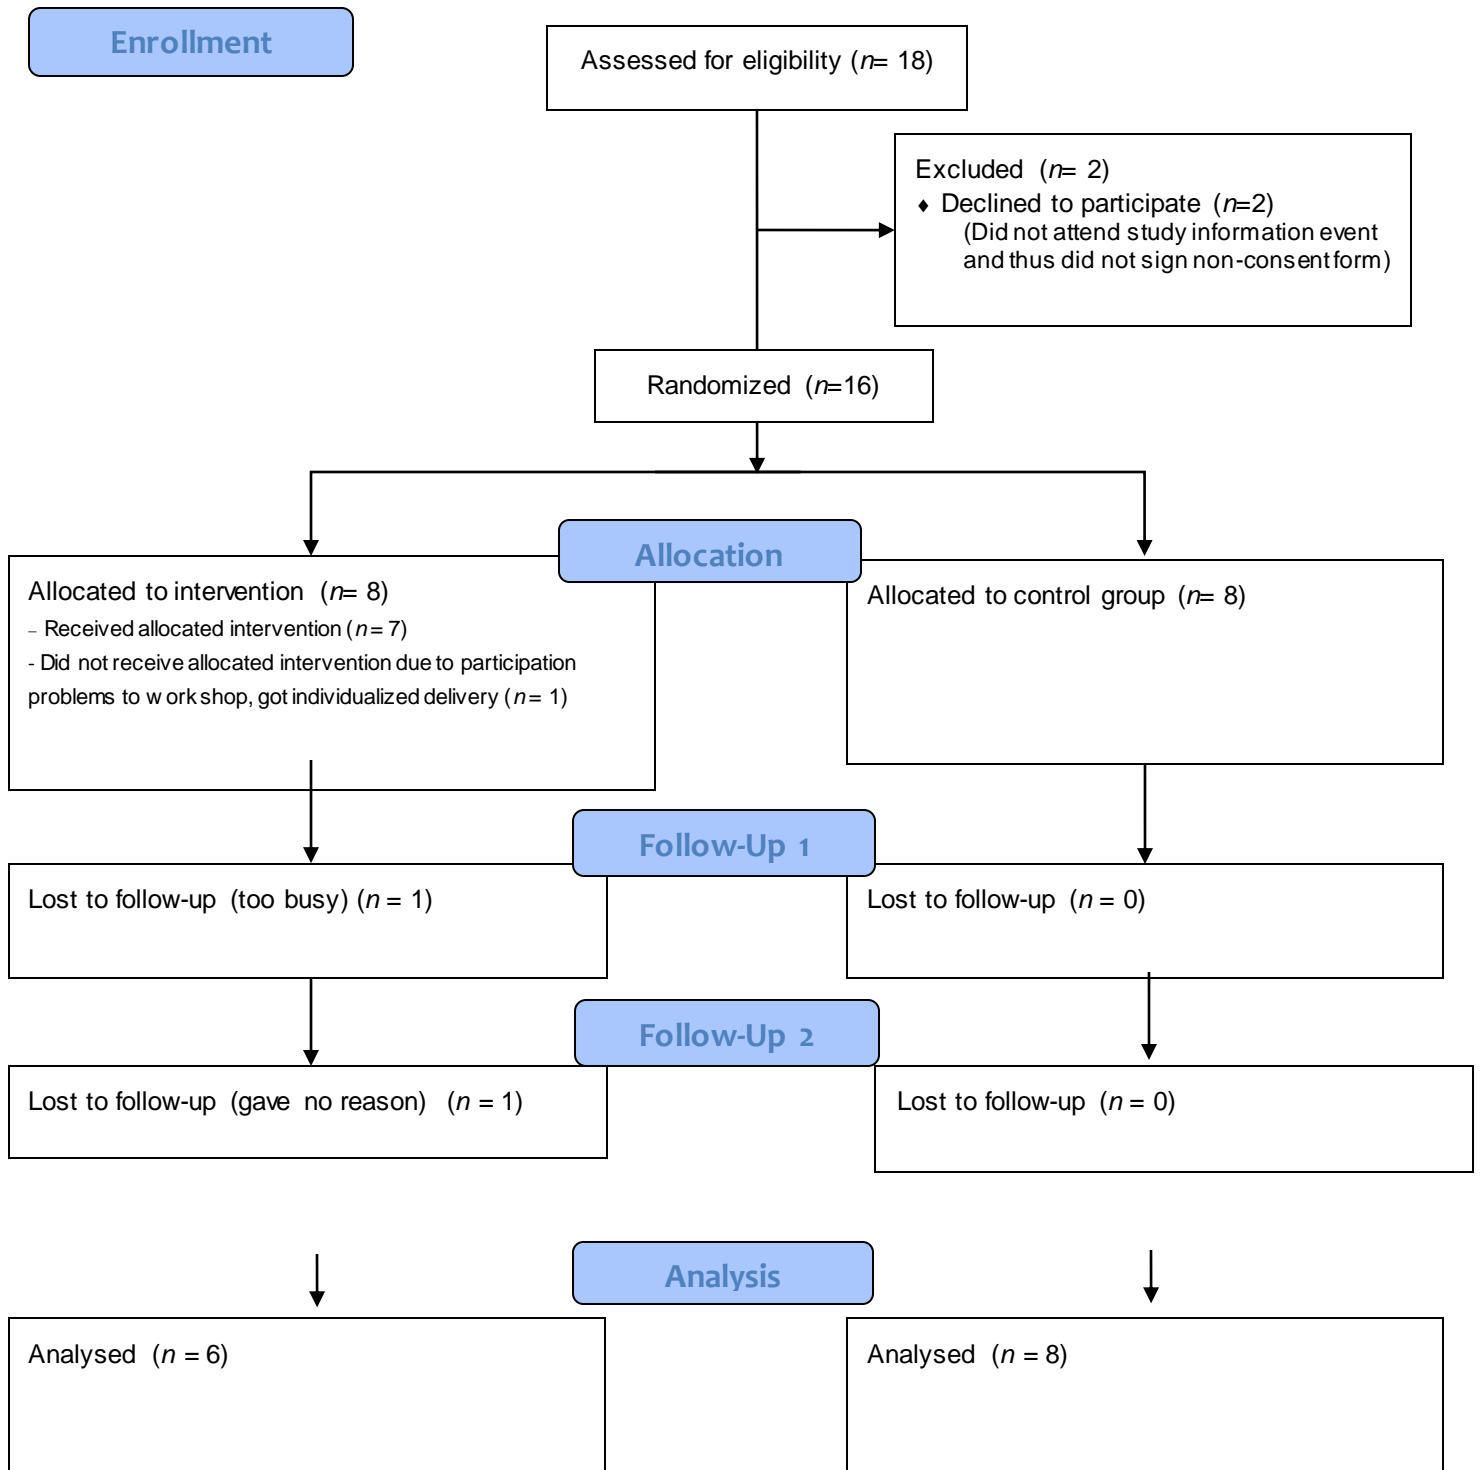

Additional Table 3. Study timeline: Data collection and intervention activities by week (numbered).

| Week                                                        | 0 | 1 | 2 | 3 | 4 | 5 | 14 | 20 | - 24 |
|-------------------------------------------------------------|---|---|---|---|---|---|----|----|------|
| <b>Data collection</b>                                      |   |   |   |   |   |   |    |    |      |
| Baseline measurement                                        | x |   |   |   |   |   |    |    |      |
| Mid-intervention measurement                                |   |   |   | x |   |   |    |    |      |
| Post-intervention measurement                               |   |   |   |   |   | x |    |    |      |
| Follow-up measurement                                       |   |   |   |   |   |   |    |    | x    |
| <b>Intervention activities</b>                              |   |   |   |   |   |   |    |    |      |
| <b>(1) GROUP PROGRAM FOR STUDENTS</b>                       |   |   |   |   |   |   |    |    |      |
| Group face-to-face sessions (1, 2) *                        |   | x | x | x | x | x |    |    |      |
| Booster sessions (phone, or if unreachable, email) * (1, 2) |   |   |   |   |   |   | x  |    |      |
| Internet resources (LifeGuide)                              |   | x | x | x | x | x | x  | x  |      |
| Social media group (1, 2) *                                 |   |   |   |   |   |   | x  |    |      |
| <b>(2) SITTING REDUCTION</b>                                |   |   |   |   |   |   |    |    |      |
| Sitting reduction workshops for teachers                    |   | x |   | x |   |   |    |    |      |
| Students' sitting reduction in classrooms *                 |   |   | x | x |   |   |    |    |      |
| <b>(3) PA EQUIPMENT IN CLASSROOMS (CHOICE ARCHITECTURE)</b> |   |   |   |   |   |   |    |    |      |
| PA equipment in classes                                     |   |   | x | x | x | x | x  |    |      |

Additional Table 4. Ratings of each session by students in anonymous feedback forms.

| Session      | Mean rating (SD) | <i>n</i> |
|--------------|------------------|----------|
| 1            | 6.35             | 17       |
| 2            | 6.20             | 20       |
| 3            | 6.23             | 22       |
| 4            | 6.26             | 23       |
| 5            | 6.14             | 7*       |
| 6/5-6        | 6.24             | 21*      |
| All sessions | 6.24 (0.07)      |          |

Note: Range 1-7, with higher numbers indicating greater satisfaction.

\*Note. Sessions 5 and 6 were delivered in the same day for one of the intervention classes, hence, they only filled in one session evaluation form for the sessions 5-6.

Additional Table 5. Pearson's correlations between use of frequency-dependent BCTs and moderate-to-vigorous activity (MVPA).

|         |              | MVPA T1 | MVPA T3 | BCTs T1       | BCTs T3      |
|---------|--------------|---------|---------|---------------|--------------|
| MVPA T1 | Pearson's r  | —       | 0.710** | <b>0.570*</b> | -0.247       |
|         | p-value      | —       | 0.003   | 0.011         | 0.340        |
|         | Upper 95% CI | —       | 0.896   | 0.814         | 0.265        |
|         | Lower 95% CI | —       | 0.310   | 0.157         | -0.650       |
| MVPA T3 | Pearson's r  |         | —       | 0.475*        | <b>0.132</b> |
|         | p-value      |         | —       | 0.030         | 0.538        |
|         | Upper 95% CI |         | —       | 0.752         | 0.509        |
|         | Lower 95% CI |         | —       | 0.054         | -0.286       |
| BCTs T1 | Pearson's r  |         |         | —             | 0.550**      |
|         | p-value      |         |         | —             | 0.002        |
|         | Upper 95% CI |         |         | —             | 0.766        |
|         | Lower 95% CI |         |         | —             | 0.222        |

\* p < .05, \*\* p < .01, \*\*\* p < .001

Additional Figure 3. Venn diagrams for students' questionnaire completion (at T1-T3), illustrating various combinations of participation and non-participation.

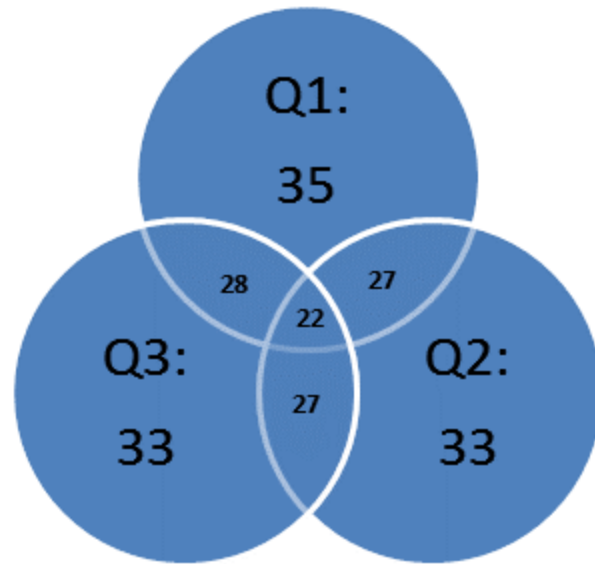

*Note.* Of the 35 students (13 control vs. 22 intervention) who completed T1 questionnaire, 27 completed T2 questionnaire (11 vs. 16) and 28 completed T3 questionnaire (10 vs. 18). Of the 33 people who completed T2 questionnaire (14 vs. 19), 27 completed T3 questionnaire (12 vs. 15), and all three questionnaires were completed by 22 people (9 vs. 13). Thus full data was acquired from 22 participants (9 control vs. 13 intervention), whereas partial data was obtained from 43 people (17 vs. 26).

Additional Figure 4.

Student evaluations of teacher activities to reduce student sitting. Mean of 7 questions. Error bars represent 95% confidence intervals.

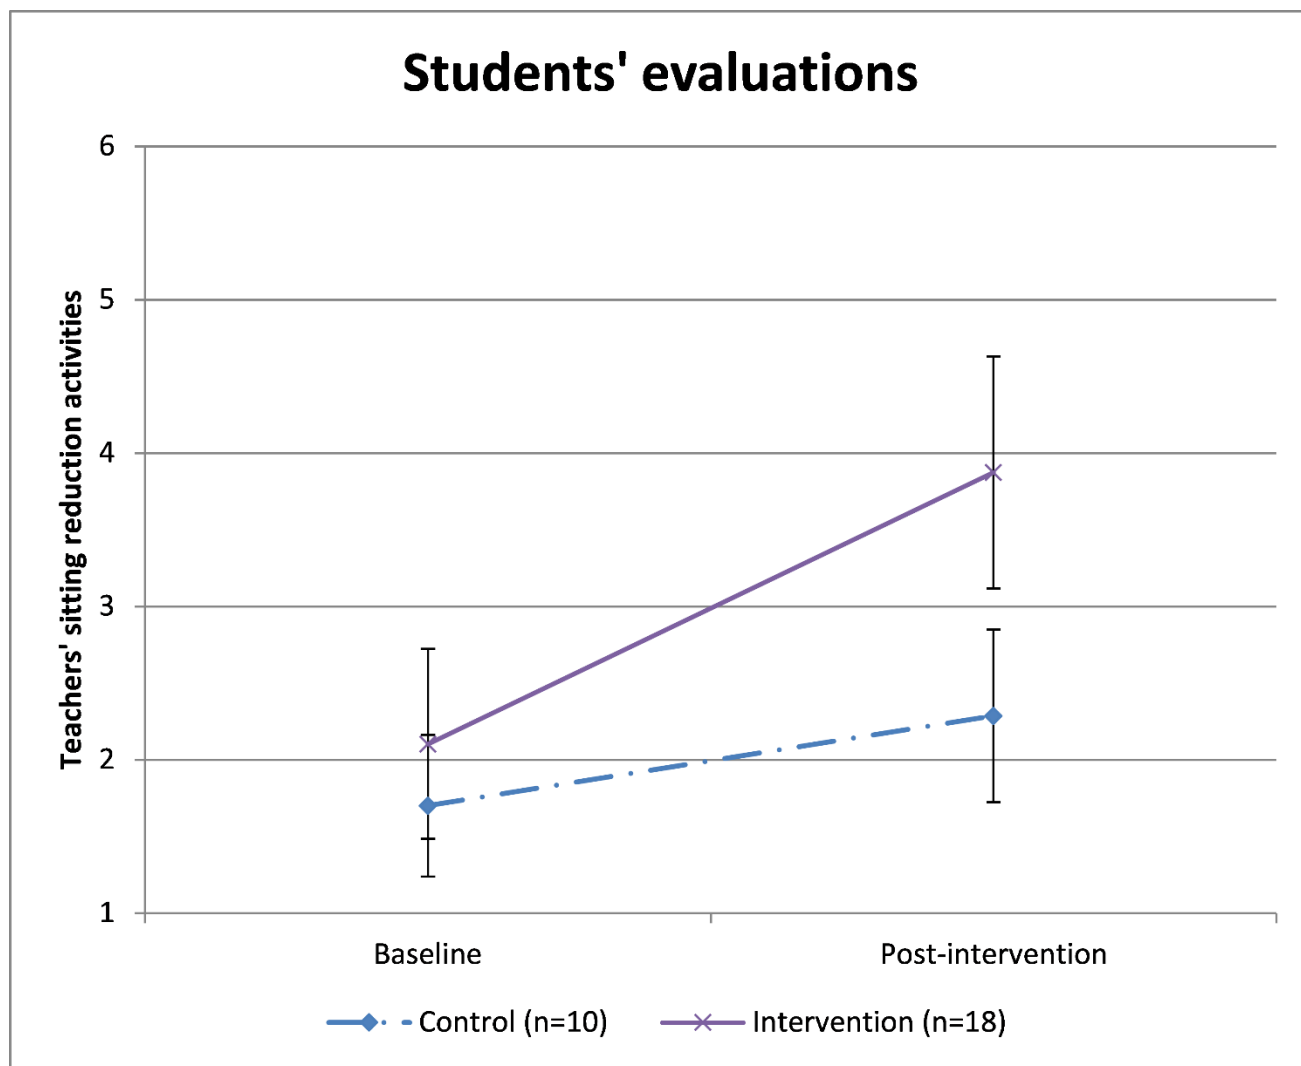

Additional Figure 5.

Teachers' self-reported activities to reduce sitting. Mean of 8 questions. Error bars represent 95% confidence intervals.

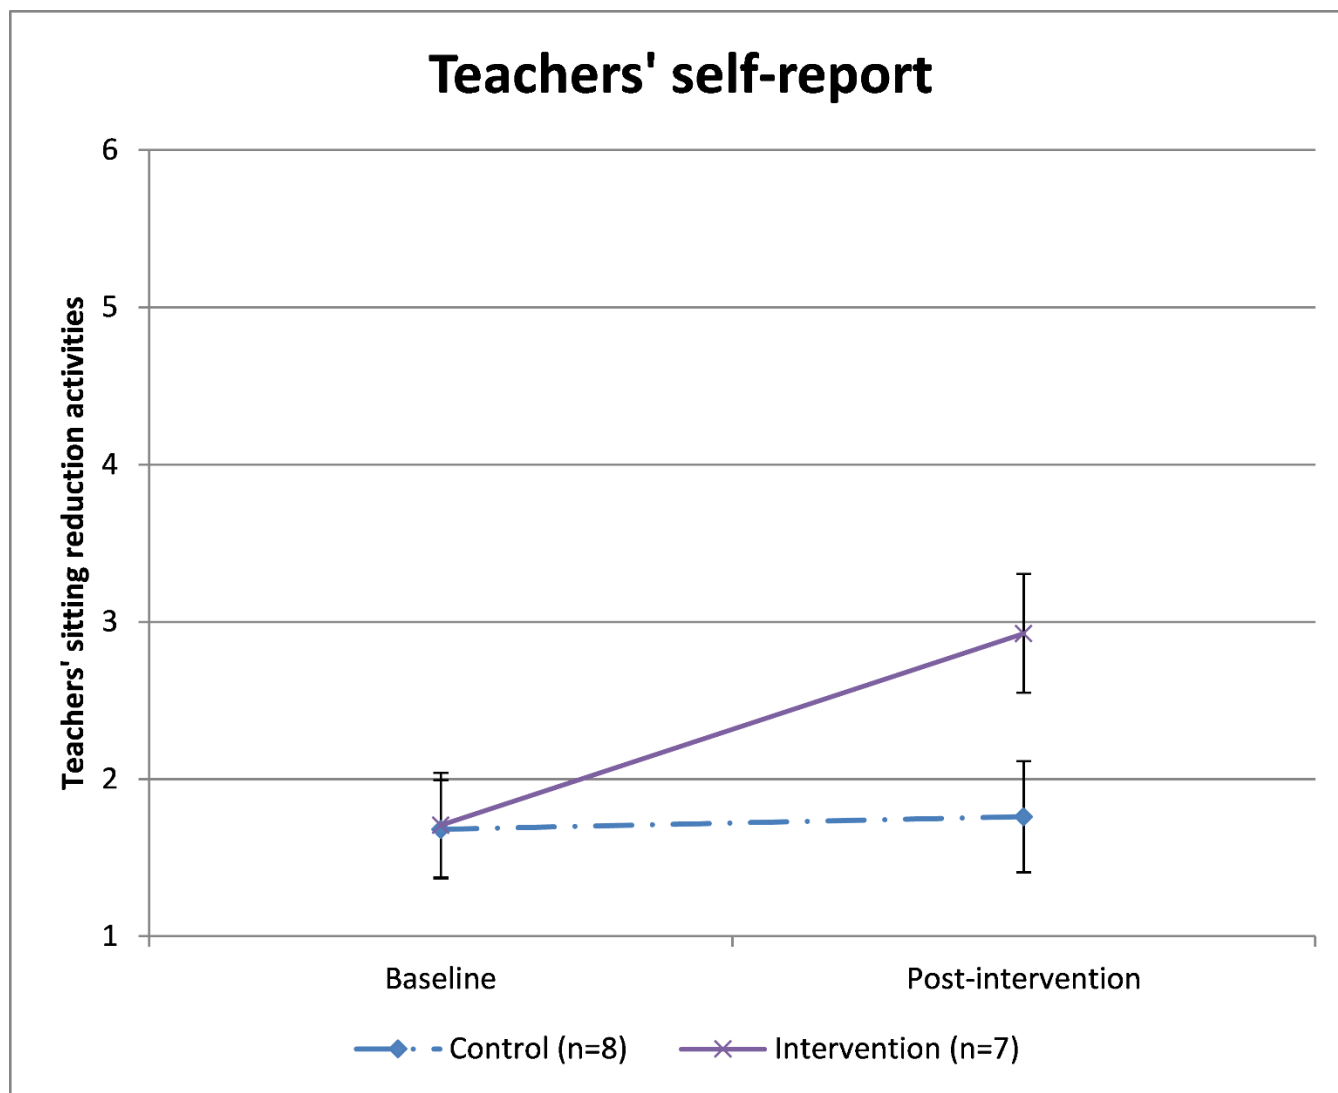

Supplement: 12966_2017_484_MOESM1_ESM.pdf [file 12966_2017_484_MOESM1_ESM.pdf]
