# Supplementary material for: Randomised controlled feasibility study of a school-based multi-level intervention to increase physical activity and decrease sedentary behaviour among vocational school students
Source: PubMed Central journal article supplement (PMC5361824; doi:10.1186/s12966-017-0484-0), 2017-03-21
Supplement: 12966_2017_484_MOESM4_ESM.pdf [file 12966_2017_484_MOESM4_ESM.pdf]

LETS MOVE IT

Let's move it

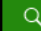

[LIIKKUVUUS](#) [RENTOUS](#) **[VIRKEYS](#)** [VOIMA](#) [VUOROVAIKUTUKSEN LISÄÄMINEN](#) [YKSINKERTAISET OHJEET LIIKUNTAVALINEIDEN KÄYTTÖÖN](#) [YKSINKERTAISIA LIIKUNNALLISIA TYÖTAPOJA](#) [YMPÄRISTÖVIHJEET](#)

Pilottiohjelman tukisivusto  
opettajille

Search ...

RECENT POSTS

LET'S MOVE IT

RECENT COMMENTS

ARCHIVES

April 2014

CATEGORIES

Yleinen

META

Log in

Entries RSS

Comments RSS

## VIRKEYS

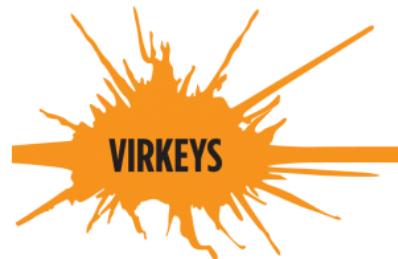

*VIRKEYS-harjoituksista on ERITYISESTI seuraavia hyötyjä:*

- Pirstävät mieltä
- Parantavat keskittymis- ja oppimiskykyä
- Tekevät kehosta virkeämmän
- Vähentävät stressiä

Tästä löydät VIRKEYTTÄ tuovia harjoituksia.

VIDEOT:

- [tuolijumppa video](#) engalnniksi (kesto 3:27)
- [tuolijumppa video](#) (kesto 1:49)
- [lämmittelyharjoitus](#) (kesto 3:00 )
- [ilmakitara](#) (kesto 3:38)

YKSITTÄISET LIIKKEET (PP-slidet)

- [virkeys kylkien taivutus ja selän rullaus](#)
- [virkeys nyrkkeily ja varpaille nousu](#)

LEAVE A REPLY

Your email address will not be published. Required fields are marked \*

Name \*

Email \*

Website

Comment

Supplemental file: Sample page from the Let's Move It teacher intervention website. Translations:

Upper bar: FLEXIBILITY – RELAXATION – ENGERGY – STRENGTH – INCREASING INTERACTION –SIMPLE INSTRUCTIONS FOR PA EQUIPMENT – SIMPLE ACTIVE CLASSROOM LEARNING STRATEGIES – ENVIRONMENTAL CUES

The text lists possible benefits from the exercises and provides links to guided videos (e.g. activity break on a chair, air guitar break) and PowerPoint slides presenting exercises to incorporate in teaching.
